# Supplementary material for: Percolation behaviors of ionic and electronic transfers in Li3−2xCoxN
Source: Royal Society of Chemistry journal article supplement (doi:10.1039/c8cp06770h), 2019-01-01
Supplement: c8cp06770h1.pdf [file c8cp06770h1.pdf]

## SUPPLEMENTARY INFORMATION

### Percolation behaviors of ionic and electronic transfers in $\text{Li}_{3-2x}\text{Co}_x\text{N}$

J.C. Badot <sup>\*1,4</sup>, E. Panabière <sup>2</sup>, N. Emery <sup>2</sup>, O. Dubrunfaut <sup>3</sup>,  
S. Bach <sup>2</sup>, and J.P. Pereira-Ramos <sup>2</sup>

<sup>1</sup> *Chimie ParisTech, PSL Research University, CNRS,  
Institut de Recherche de Chimie Paris, 75005 Paris, France*

<sup>2</sup> *Institut de Chimie et des Matériaux Paris-Est, CNRS, Groupe d'Electrochimie et  
Spectroscopie des Matériaux (GESMAT), 2-8, rue Henri Dunant - 94320 Thiais, France*

<sup>3</sup> *GeePs | Group of Electrical Engineering - Paris, UMR CNRS 8507, CentraleSupélec,  
Sorbonne Universités, UPMC Univ Paris 06, Univ Paris-Sud, Université Paris-Saclay,  
11 rue Joliot-Curie, 91192 Gif-sur-Yvette, France*

<sup>4</sup> *Réseau sur le Stockage Electrochimique de l'Energie (RS2E), FR CNRS 3459, France*

<sup>5</sup> *Université d'Evry Val d'Essonne, Dept Chimie, Bd F. Mitterrand, 91000 Evry*

## S1. Dielectric spectroscopy device used for measurements from 60 Hz to 10 GHz

Complex permittivity and conductivity of  $\text{Li}_{3-2x}\text{Co}_x\text{N}$  were measured by the broadband dielectric spectroscopy (BDS) from 60 to  $10^{10}$  Hz, using simultaneously a network analyzer Agilent PNA E8364B ( $10^7$  to  $10^{10}$  Hz), two impedance analyzers Agilent 4294 (60 to  $1.1 \times 10^8$  Hz) and Agilent 4291 ( $10^6$  to  $1.8 \times 10^9$  Hz). The experimental device consists of a coaxial cell (APC7 standard), in which the cylindrically shaped sample (diameter = 3 mm and thickness  $\approx$  1 mm) fills the gap between the inner conductor and a short-circuit (Fig. S1).

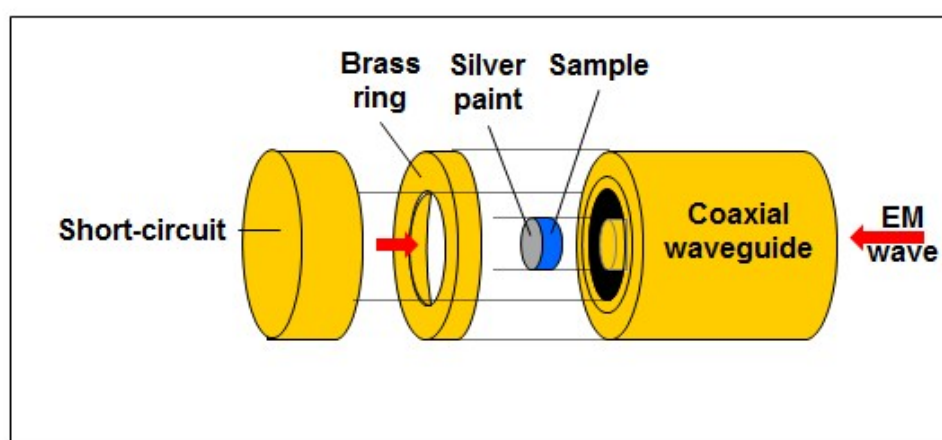

**Figure S1** .Schema of the cell for dielectric measurements between 60 and  $10^{10}$  Hz

The sample is covered with a silver paint on its two opposite sides to have good electrical contacts with coaxial waveguide. The brass ring allows to ensure the electrical continuity of the outer-conductor of the coaxial waveguide.

## S2. Determination of ionic and electronic conductivities of $\text{Li}_{3-2x}\text{Co}_x\text{N}$ grains

### *Conductivity Nyquist plots of $\text{Li}_{3-2x}\text{Co}_x\text{N}$ ( $x = 0, 0.05$ and $0.18$ )*

Conductivity Nyquist plots ( $\sigma''$  vs.  $\sigma'$ ) are more obvious than the resistivity Nyquist plots ( $\rho''$  vs.  $\rho'$ ) in some cases (see Fig. S2). The grain bulk conductivity is plotted by a straight line in the conductivity complex plane. This straight line can be transformed by inversion into a circular arc which passes through the origin in the resistivity complex plane. Hence, it is sometimes easier to draw a straight line than a circular arc in higher frequency range.

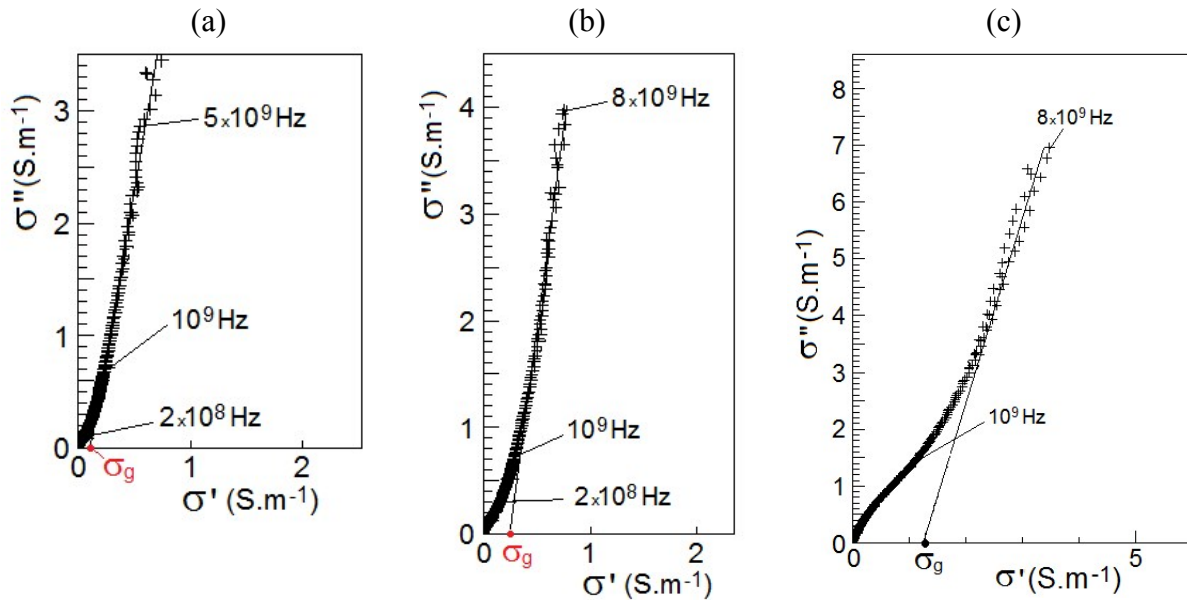

**Figure S2.** High frequency part of complex conductivity Nyquist plots ( $\sigma''(\omega)$  vs.  $\sigma'(\omega)$ ) for the samples: a)  $\text{Li}_3\text{N}$  (LCN0), b)  $\text{Li}_{2.9}\text{Co}_{0.05}\text{N}$  (LCN1) and c)  $\text{Li}_{2.64}\text{Co}_{0.18}\text{N}$  (LCN4) at 300 K: evidence of straight line giving the grain conductivity  $\sigma_g$ .

**Resistivity Nyquist plots of  $Li_{3-2x}Co_xN$  ( $x = 0.25$ )**

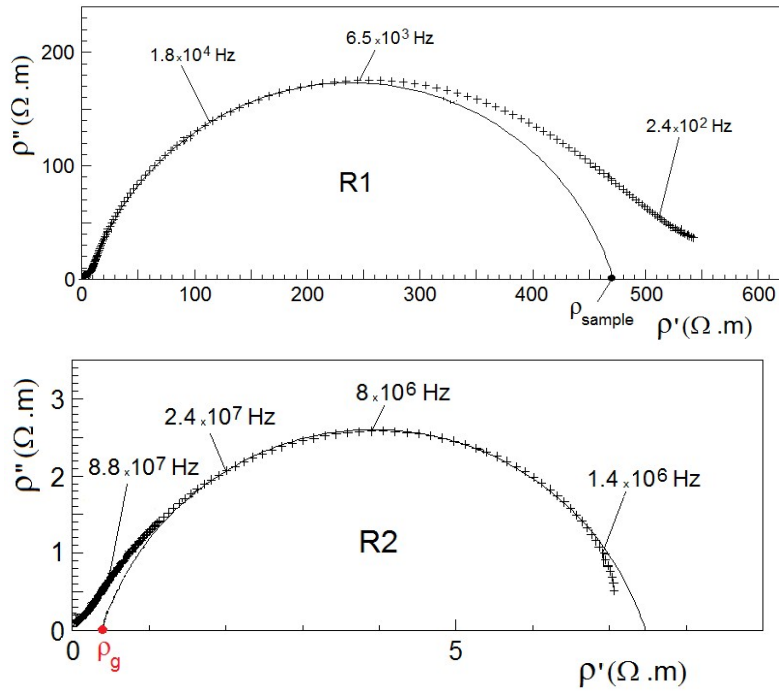

**Figure S3.** Complex resistivity Nyquist plots ( $\epsilon''(\omega)$  vs.  $\epsilon'(\omega)$ ) for the sample  $Li_{2.5}Co_{0.25}N$  at 300 K: a) evidence of the relaxation domain R1 (particle/particle contacts) in the entire plot from 40 to  $10^{10}$  Hz (the deviation from R1 is due to contact sample/silver paint in the lower frequency range); b) evidence of the relaxation domain R2 (grain/grain contacts).  $\rho_g$  is the grain resistivity inverse of the grain conductivity  $\sigma_g$ .

### S3. Dielectric relaxations in $\text{Li}_{3-2x}\text{Co}_x\text{N}$ samples

#### *Permittivity Nyquist plots of $\text{Li}_3\text{N}$*

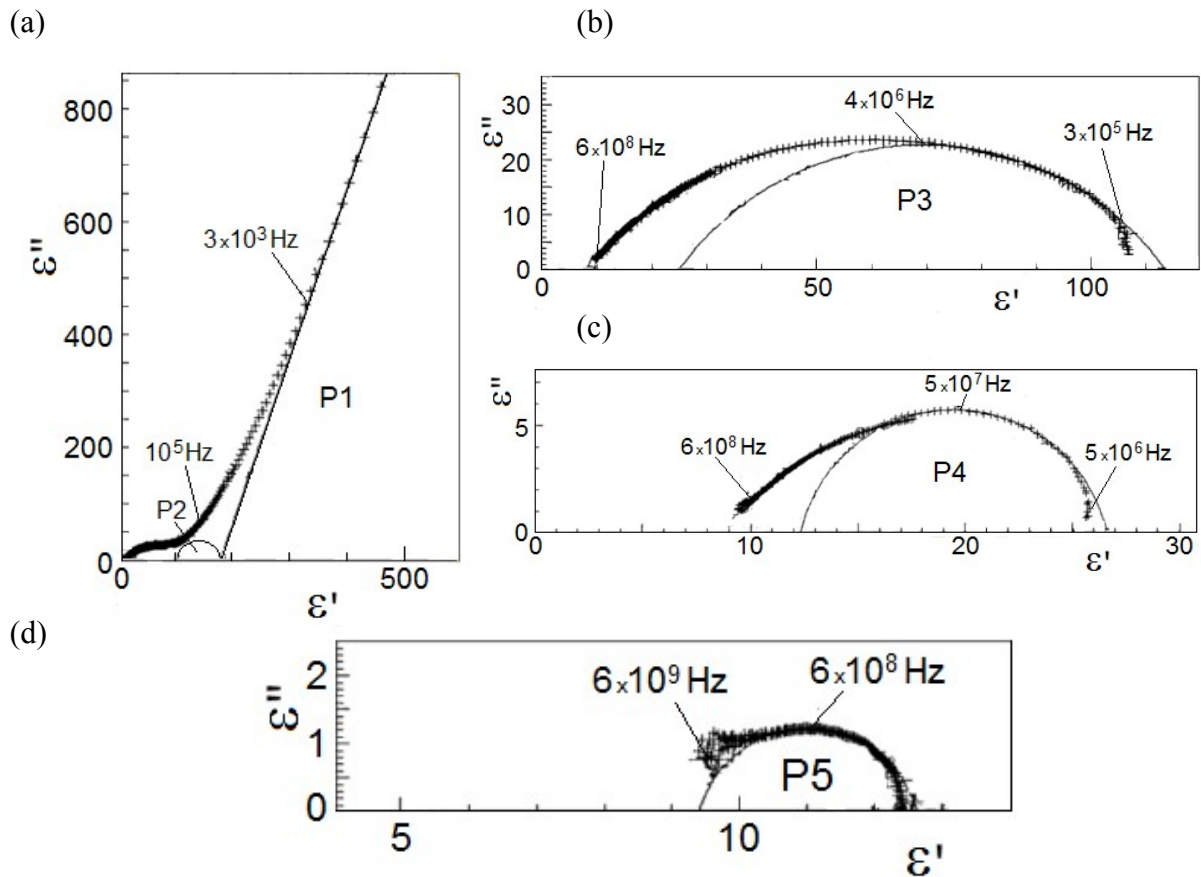

**Figure S4.** Nyquist plots of the imaginary part  $\epsilon''(\omega)$  vs. the real part  $\epsilon'(\omega)$  of the complex permittivity at 300 K for the sample  $\text{Li}_3\text{N}$ : a) entire plot from 40 to  $10^{10}$  Hz: only the low frequency contribution P1 is visible; b) plot obtained upon subtracting the domain P1: evidence of the relaxation domains P2 (sample polarization) and P3 (particle polarization); c) plot obtained upon subtracting domains P2 and P3: evidence of the relaxation domain P4 (grain polarization); d) plot obtained upon subtracting the domain P4: evidence of the relaxation domain P5 (local  $\text{Li}^+$  hopping).

*Permittivity Nyquist plots of  $\text{Li}_{2.50}\text{Co}_{0.25}\text{N}$*

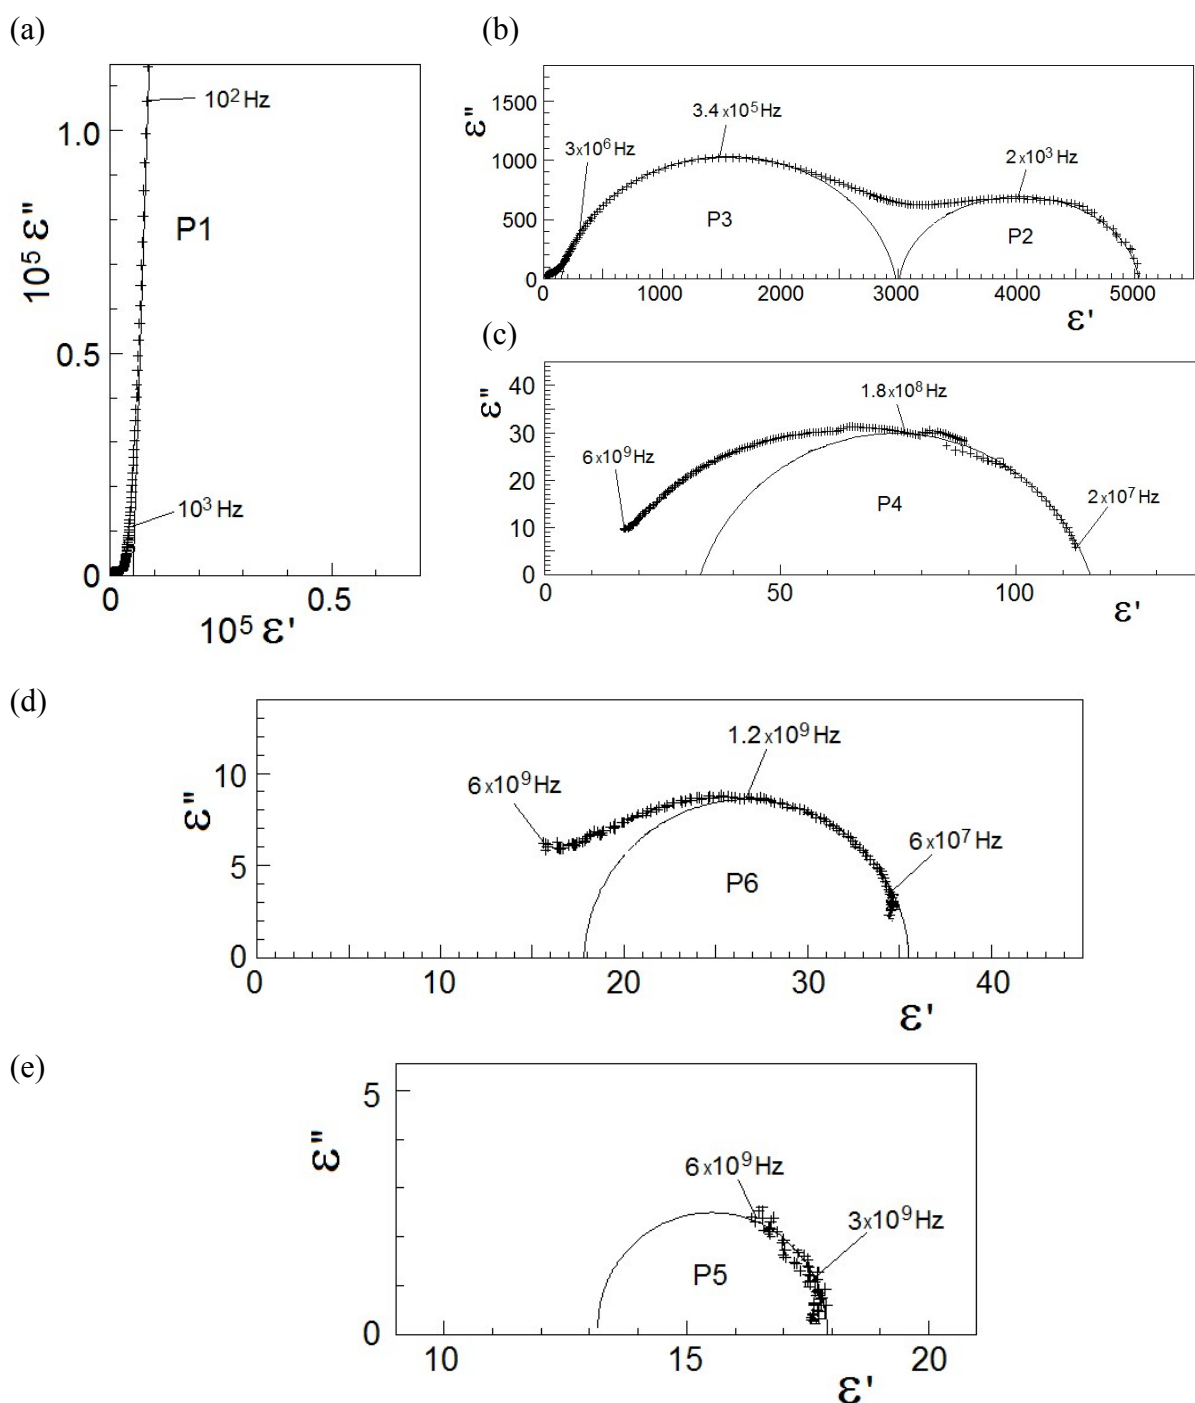

**Figure S5.** Nyquist plots of the imaginary part  $\epsilon''(\omega)$  vs. the real part  $\epsilon'(\omega)$  of the complex permittivity at 300 K for the sample  $\text{Li}_{2.50}\text{Co}_{0.25}\text{N}$ : a) entire plot from 40 to  $10^{10}$  Hz: only the low frequency contribution P1 is visible; b) plot obtained upon subtracting the domain P1: evidence of the relaxation domains P2 (sample polarization) and P3 (particle polarization); c) plot obtained upon subtracting domains P2 and P3: evidence of the relaxation domain P4 (grain polarization); d) plot obtained upon subtracting the domain P4: evidence of the relaxation domain P5 (local  $\text{Li}^+$  hopping); e) plot obtained upon subtracting the domain P5: evidence of the relaxation domain P6 (local electron hopping).

*Permittivity Nyquist plots of  $\text{Li}_{2.64}\text{Co}_{0.18}\text{N}$*

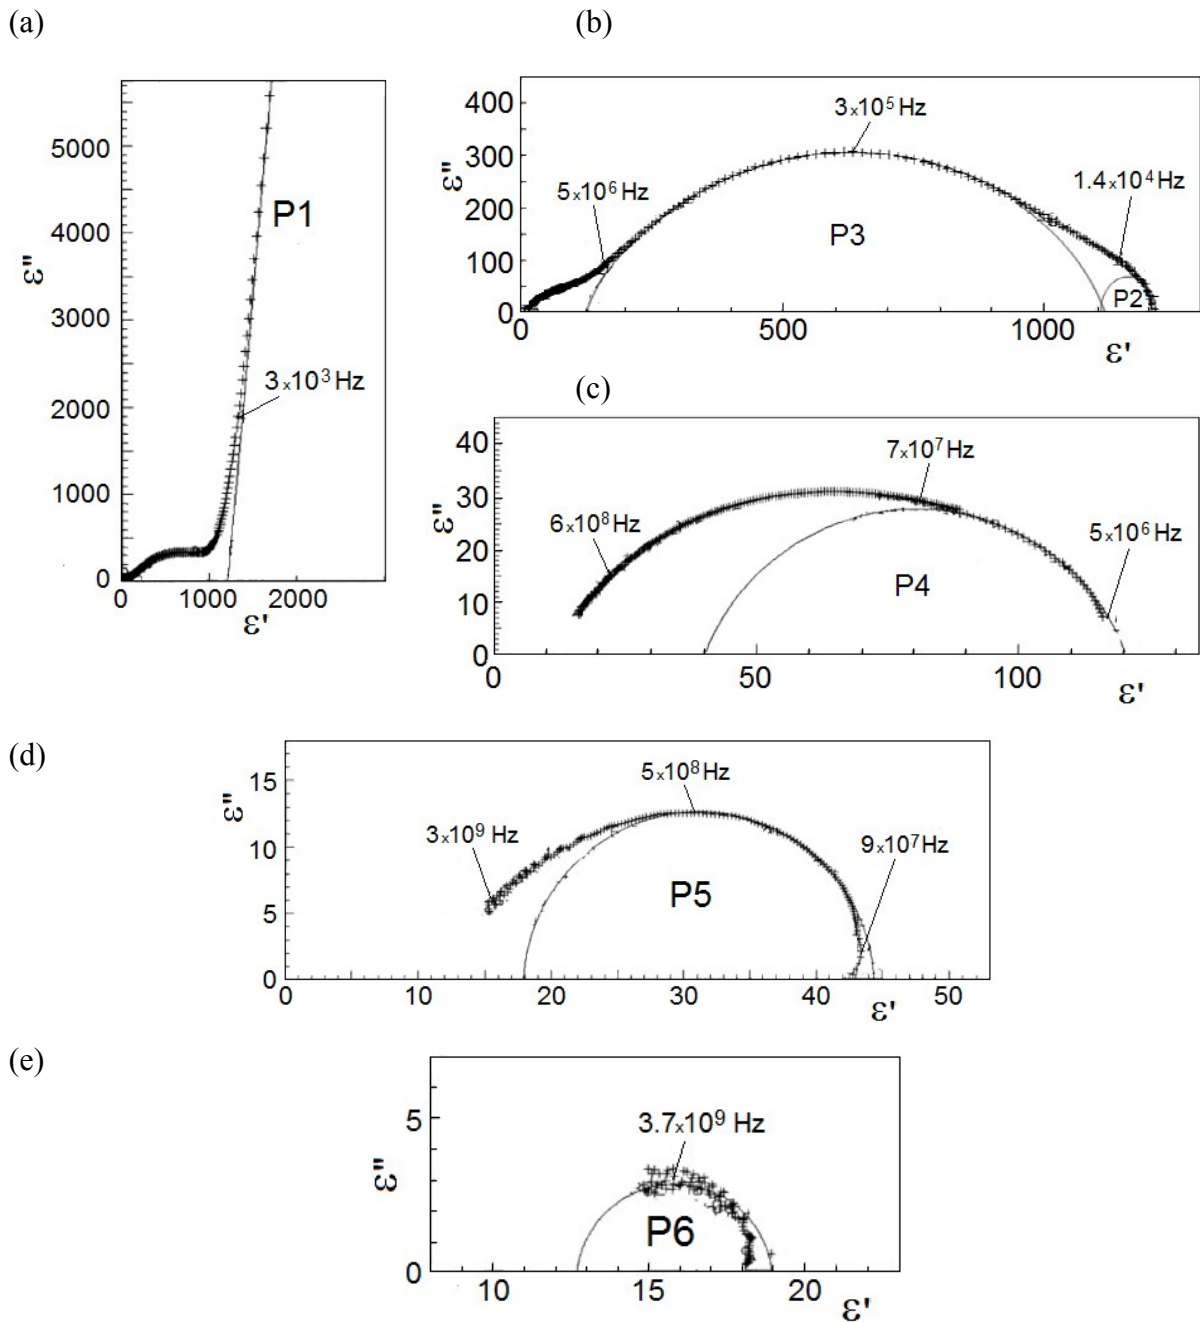

**Figure S6.** Nyquist plots of the imaginary part  $\epsilon''(\omega)$  vs. the real part  $\epsilon'(\omega)$  of the complex permittivity at 300 K for the sample  $\text{Li}_{2.64}\text{Co}_{0.18}\text{N}$ : a) entire plot from 40 to  $10^{10}$  Hz: only the low frequency contribution P1 is visible; b) plot obtained upon subtracting the domain P1: evidence of the relaxation domains P2 (sample polarization) and P3 (particle polarization); c) plot obtained upon subtracting domains P2 and P3: evidence of the relaxation domain P4 (grain polarization); d) plot obtained upon subtracting the domain P4: evidence of the relaxation domain P5 (local  $\text{Li}^+$  hopping); e) plot obtained upon subtracting the domain P5: evidence of the relaxation domain P6 (local electron hopping).

*Permittivity Nyquist plots of  $\text{Li}_{2.12}\text{Co}_{0.44}\text{N}$*

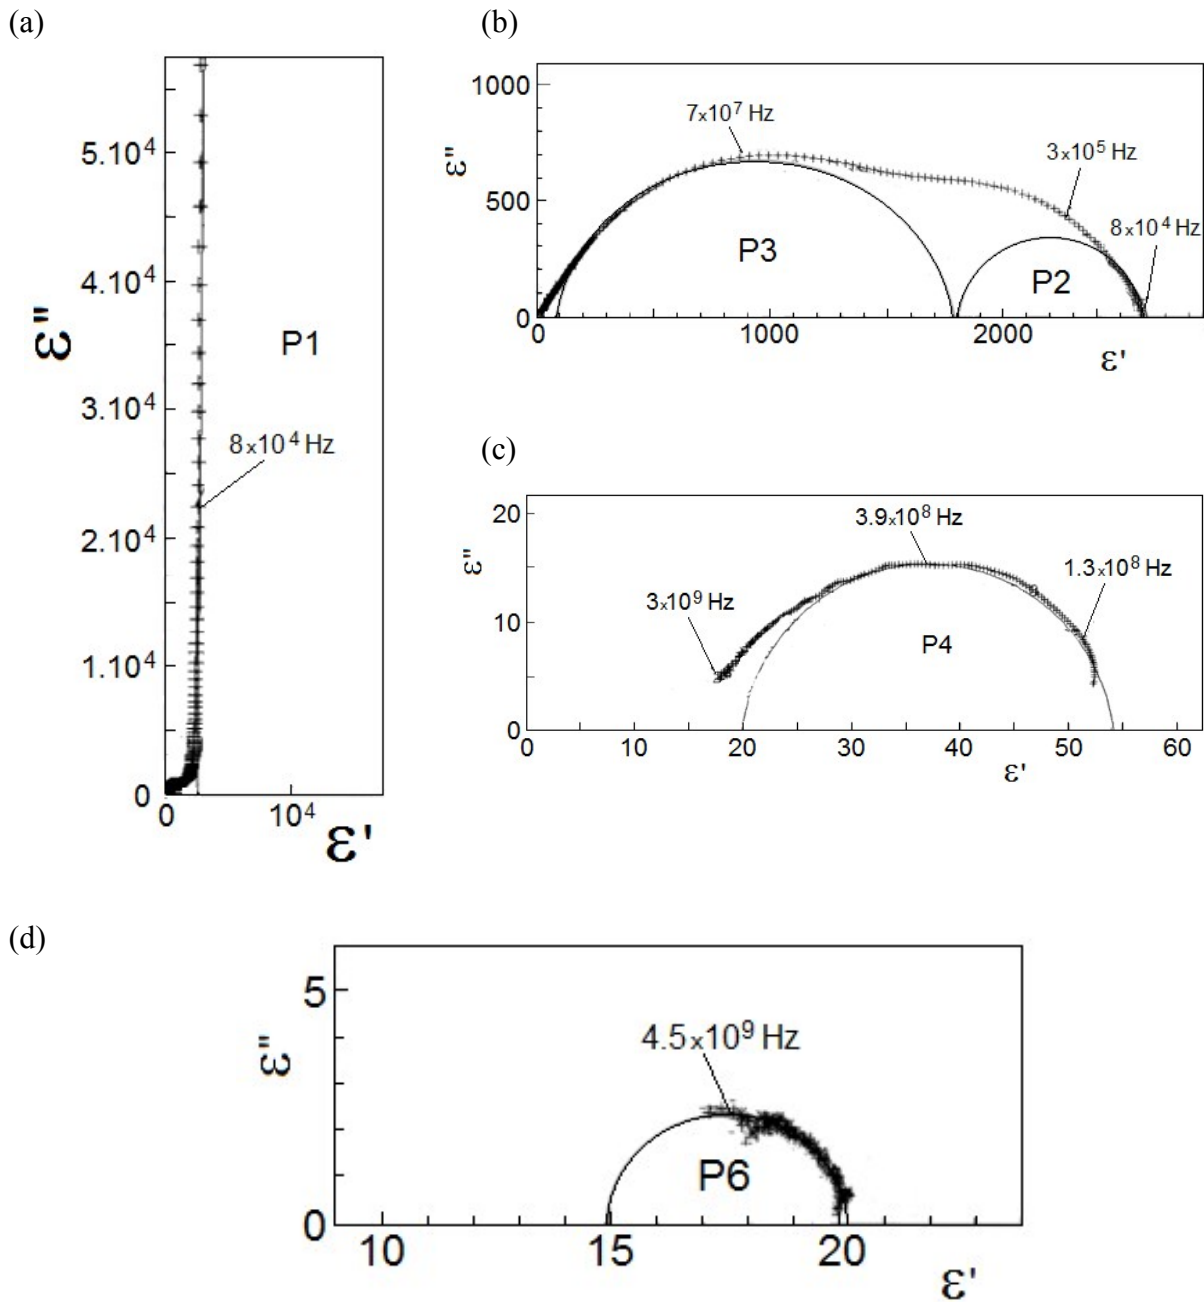

**Figure S7.** Nyquist plots of the imaginary part  $\epsilon''(\omega)$  vs. the real part  $\epsilon'(\omega)$  of the complex permittivity at 300 K for the sample  $\text{Li}_{2.12}\text{Co}_{0.44}\text{N}$ : a) entire plot from 40 to  $10^{10}$  Hz: only the low frequency contribution P1 is visible; b) plot obtained upon subtracting the domain P1: evidence of the relaxation domains P2 (sample polarization) and P3 (particle polarization); c) plot obtained upon subtracting domains P2 and P3: evidence of the relaxation domain P4 (grain polarization); d) plot obtained upon subtracting the domain P4: evidence of the relaxation domain P6 (local electron hopping).



### *Summary of the interfacial contributions*

**Table S1.** Space-charge dielectric relaxations contributions (sample, particle and grain polarizations) at room temperature.  $s$  is the parameter of the power-law term  $A(i\omega)^{s-1}$  of the lower frequency part of the complex permittivity (see expression 7 in the manuscript).  $\nu_s$ ,  $\nu_p$  and  $\nu_g$  are the relaxation frequencies of sample, particle and grain polarizations, respectively.  $\nu_{0g}$  and  $E_g$  are respectively the prefactor and the activation energy of  $\nu_g$ .  $\Delta\epsilon_s$ ,  $\Delta\epsilon_p$  and  $\Delta\epsilon_g$  are the dielectric strengths of sample, particle and grain polarizations, respectively.

| $\text{Li}_{3-2x}\text{Co}_x\text{N}$                        | Low-frequency   | Sample                                   | Particle                                 | Grain                                    |                               |
|--------------------------------------------------------------|-----------------|------------------------------------------|------------------------------------------|------------------------------------------|-------------------------------|
|                                                              | Power law<br>P1 | P2<br>$\nu_s$ (Hz)<br>$\Delta\epsilon_s$ | P3<br>$\nu_p$ (Hz)<br>$\Delta\epsilon_p$ | P4<br>$\nu_g$ (Hz)<br>$\Delta\epsilon_g$ | $\nu_{0g}$ (Hz)<br>$E_g$ (eV) |
|                                                              | $s$             |                                          |                                          |                                          |                               |
| <b><math>\text{Li}_3\text{N}</math></b>                      |                 |                                          |                                          |                                          |                               |
| $x = 0.00^*$                                                 | 0.30            | $1.0 \times 10^5$<br>90                  | $4.0 \times 10^6$<br>90                  | $5.0 \times 10^7$<br>14                  | $4.1 \times 10^{12}$<br>0.28  |
| <b><math>\text{Li}_{2.90}\text{Co}_{0.05}</math></b>         |                 |                                          |                                          |                                          |                               |
| $x = 0.05^*$                                                 | 0.45            | $1.7 \times 10^3$<br>1700                | $2.0 \times 10^6$<br>123                 | $2.0 \times 10^7$<br>17                  | $6.0 \times 10^{12}$<br>0.31  |
| <b><math>\text{Li}_{2.76}\text{Co}_{0.12}\text{N}</math></b> |                 |                                          |                                          |                                          |                               |
| $x = 0.12^*$                                                 | 0.06            | $4.0 \times 10^3$<br>800                 | $6.3 \times 10^4$<br>3300                | $1.3 \times 10^7$<br>160                 | $6.1 \times 10^{12}$<br>0.33  |
| <b><math>\text{Li}_{2.64}\text{Co}_{0.18}\text{N}</math></b> |                 |                                          |                                          |                                          |                               |
| $x = 0.18^*$                                                 | 0.06            | $1.4 \times 10^4$<br>100                 | $3.0 \times 10^5$<br>1000                | $7.0 \times 10^7$<br>80                  | $4.7 \times 10^{12}$<br>0.28  |
| <b><math>\text{Li}_{2.50}\text{Co}_{0.25}\text{N}</math></b> |                 |                                          |                                          |                                          |                               |
| $x = 0.25^*$                                                 | 0.01            | $2.0 \times 10^3$<br>2000                | $3.4 \times 10^5$<br>3000                | $1.8 \times 10^8$<br>83                  | $1.1 \times 10^{13}$<br>0.29  |
| <b><math>\text{Li}_{2.36}\text{Co}_{0.32}\text{N}</math></b> |                 |                                          |                                          |                                          |                               |
| $x = 0.32^{**}$                                              | 0.02            | $3.0 \times 10^4$<br>1100                | $4.0 \times 10^5$<br>3900                | $5.0 \times 10^7$<br>80                  | $1.3 \times 10^{12}$<br>0.26  |
| <b><math>\text{Li}_{2.22}\text{Co}_{0.39}\text{N}</math></b> |                 |                                          |                                          |                                          |                               |
| $x = 0.39^{**}$                                              | 0.01            | $8.0 \times 10^4$<br>400                 | $1.0 \times 10^6$<br>4780                | $1.0 \times 10^8$<br>94                  | $9.0 \times 10^{11}$<br>0.23  |
| <b><math>\text{Li}_{2.12}\text{Co}_{0.44}\text{N}</math></b> |                 |                                          |                                          |                                          |                               |
| $x = 0.44^{**}$                                              | 0.00            | $3.0 \times 10^5$<br>800                 | $7.0 \times 10^7$<br>1700                | $3.9 \times 10^8$<br>34                  | $1.2 \times 10^{12}$<br>0.21  |

\* Ionic conductors; \*\* Electronic conductors.

#### S4. Dielectric relaxation and percolation [1]

Inhomogeneous conducting materials have a percolation thresholds which depend largely on their geometries (dimensionality, structure). These materials contain a conductive region mixed with an insulating (or low conductive) region. The conductive region is constituted by clusters in which the charge carriers move freely. The isolated clusters electrically polarized with a dielectric response given by a relaxation whose main parameters are the dielectric strength  $\Delta\varepsilon$  (related to the polarization intensity and the cluster size) and the relaxation time  $\tau$  which corresponds to the transit time from one edge to the other of the cluster.

The dielectric strength  $\Delta\varepsilon$  and the relaxation frequency  $\nu = 1/2\pi\tau$  of a percolating system are given by the following power law forms [1]:

$$\Delta\varepsilon \sim |\phi - \phi_c|^{-s} \quad (\text{S4.1})$$

$$\nu \sim |\phi - \phi_c|^{s+t} \quad (\text{S4.2})$$

below and above  $\phi_c$ .  $f$  is the volume fraction of the conductor,  $\phi_c$  the percolation threshold.  $s$  and  $t$  are critical exponents.

Below the threshold, the material is an insulator because the clusters are not connected. Thus the size  $\xi$  of the clusters increases until some of them become percolated through the sample (at the threshold). The dielectric strength  $\Delta\varepsilon$  and the relaxation time  $\tau$  ( i.e. the transit time from one edge to the other of the cluster ), which vary in the same way as  $\xi$ , tend toward  $\infty$  (or a great value) at the threshold according to the percolation theory (see Fig. 9d and 9e of the manuscript). The relaxation frequency  $\nu = 1/2\pi\tau$  tends thus toward zero (or a minimum value) at the threshold.

[1] A.L. Efros, B.I. Shklovskii. *Phys. stat. sol. (b)*, 1976, **76**, 475-485

Above the threshold, the material is conductor with connected clusters throughout its volume. However, as some isolated clusters remain in the material their size  $\xi$ , dielectric strength  $\Delta\varepsilon$  and  $\tau$  decrease sharply according to the percolation theory. Thus, the relaxation frequency  $\nu$  increases sharply (see Fig. 9d and 9e of the manuscript). These behaviors correspond to a sharp diminution of the size and the number of isolated clusters.
